# Supplementary material
Source: PubMed Central journal article supplement (PMC6697345)
Supplement: mmc1.pdf [file mmc1.pdf]

YMTHE, Volume 27

## Supplemental Information

**Life-Long AAV-Mediated CRISPR Genome Editing  
in Dystrophic Heart Improves Cardiomyopathy  
without Causing Serious Lesions in *mdx* Mice**

**Li Xu, Yeh Siang Lau, Yandi Gao, Haiwen Li, and Renzhi Han**

1 **Supplementary Figures**

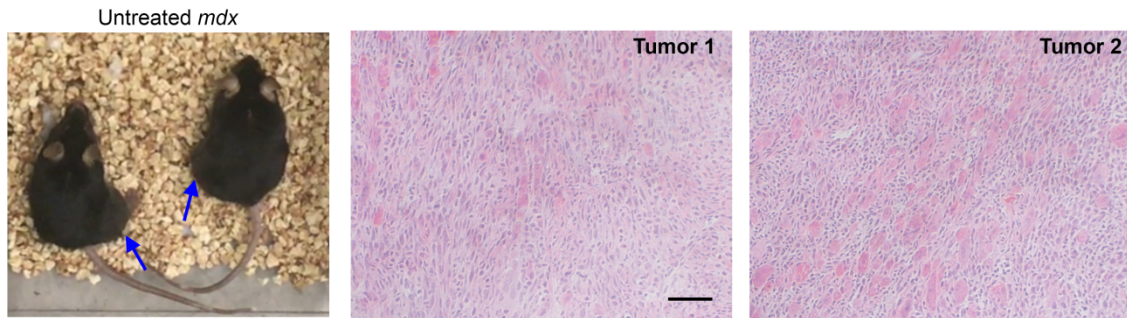

2

3 **Suppl. Fig. 1.** H&E images of the spontaneous rhabdomyosarcoma developed in two control  
4 *mdx* mice at 19 months of age.

5

6

7

8

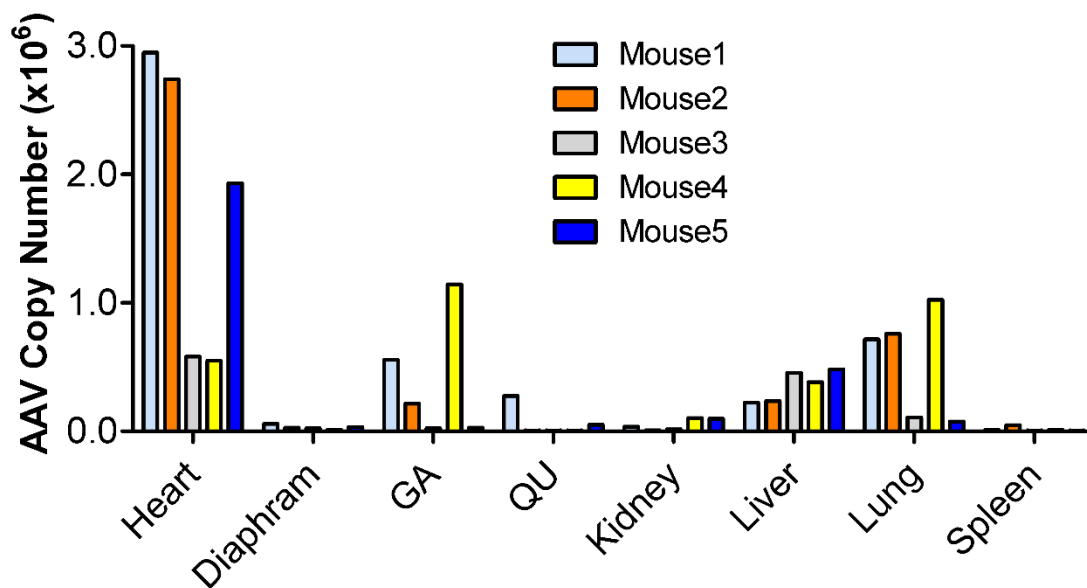

9

10 **Suppl. Fig. 2.** Quantification of AAV copy numbers in various tissues of individual AAV-  
11 treated *mdx* mice at 19 months of age.

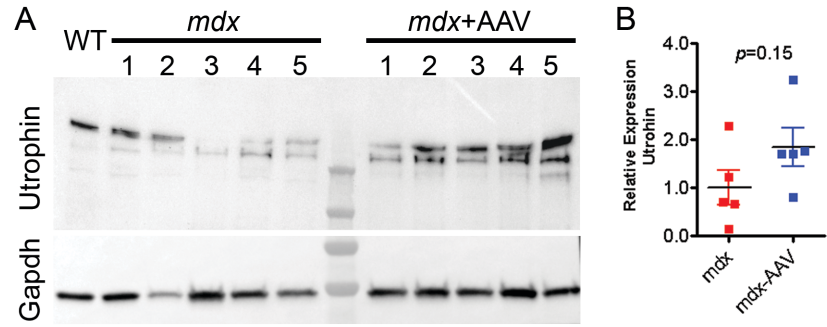

1  
2  
3  
4  
5  
6  
7

**Suppl. Fig. 3.** A. Western blot analysis of utrophin expression in heart lysates from 19-month-old WT and *mdx* mice treated with or without rAAV-CRISPR ( $1 \times 10^{12}$  vg, i.p. at day3). Gapdh was used as a gel loading control. B. Densitometry quantification of relative expression of total dystrophin on Western blot.

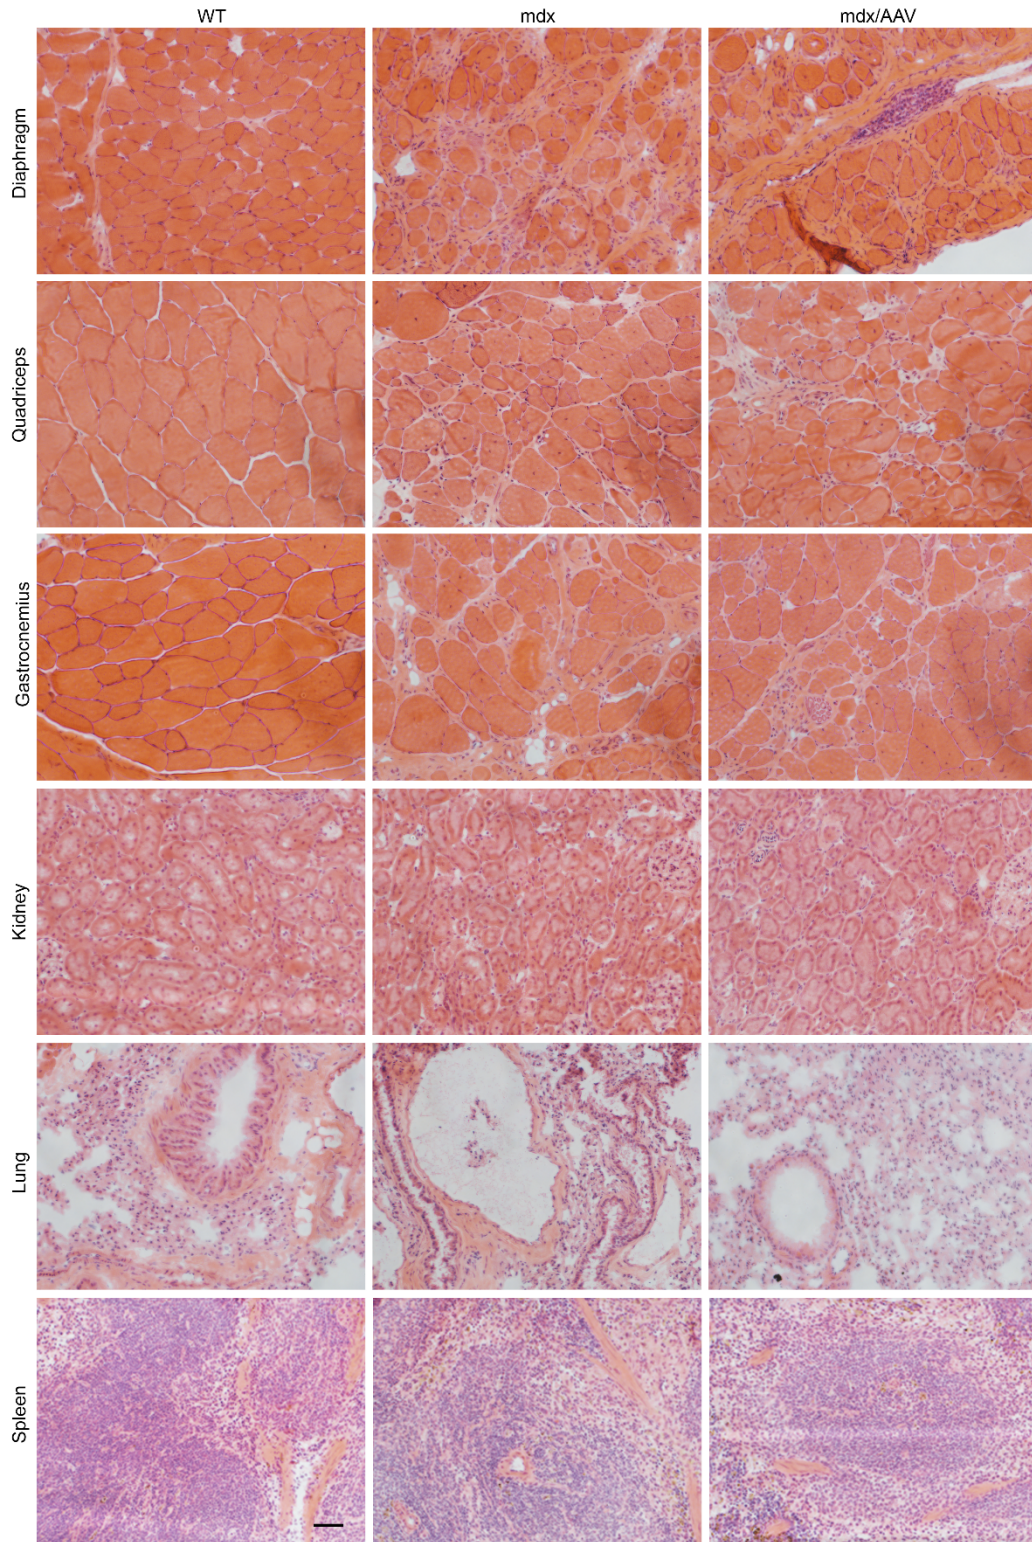

1

2 **Suppl. Fig. 4.** H&E staining of tissue cryosections from the WT and *mdx* mice with or without

3 rAAV-CRISPR at 19 months of age. Scale bar, 50  $\mu$ m.
